# Supplementary material
Source: ML conference proceedings conference paper supplement (https://proceedings.neurips.cc/paper_files/paper/2019/hash/9ca8c9b0996bbf05ae7753d34667a6fd-Abstract.html)
Supplement: Supplementary file 1 [file 9ca8c9b0996bbf05ae7753d34667a6fd-Supplemental.zip]

Archive with 1 entries (1 files):
- sup.pdf
