# Supplementary material
Source: ML conference proceedings conference paper supplement (https://proceedings.neurips.cc/paper_files/paper/2019/hash/9ca8c9b0996bbf05ae7753d34667a6fd-Abstract.html)
Supplement: Supplementary file 1 [file 9ca8c9b0996bbf05ae7753d34667a6fd-Supplemental.zip › sup.pdf]

---

# Supplementary Material for “Latent Weights Do Not Exist: Rethinking Binarized Neural Network Optimization”

---

Anonymous Author(s)

Affiliation

Address

email

1 **Theorem 1.** *The binary weight vector generated by Algorithm 1 is invariant under scaling of the*  
2 *learning rate,  $\alpha$ , provided the initial conditions are scaled accordingly and the pseudo-gradient,  $\Phi$ ,*  
3 *does not depend on  $|\tilde{w}|$ .*

4 *Proof.* Consider a single weight. Let  $\tilde{w}_t$  be the latent weight at time  $t$ ,  $g_t$  the pseudo-gradient and  $\delta_t$   
5 the update step generated by the optimizer  $\mathcal{A}$ . Then:

$$\tilde{w}_{t+1} = \tilde{w}_t + \alpha \delta_t.$$

6 Now take some positive scalar  $C$  by which we scale the learning rate. Replace the weight by  
7  $\tilde{v}_t = C\tilde{w}_t$ . Since  $\text{sign}(\tilde{v}_t) = \text{sign}(\tilde{w}_t)$ , the binary weight is unaffected. Therefore the forward pass  
8 at time  $t$  is unchanged and we obtain an identical pseudo-gradient  $g_t$  and update step  $\delta_t$ . We see:

$$\tilde{v}_{t+1} = \tilde{v}_t + C\alpha\delta_t = C \cdot (\tilde{w}_t + \alpha\delta_t) = C\tilde{w}_{t+1}.$$

9 Thus  $\text{sign}(\tilde{v}_{t+1}) = \text{sign}(\tilde{w}_{t+1})$ . By induction, this holds for  $\forall t' > t$  and we conclude the BNN is  
10 unaffected by the change in learning rate.  $\square$
